# Supplementary material for: Acute kidney injury as an independent risk factor for unplanned 90-day hospital readmissions
Source: PubMed Central journal article supplement (PMC5217258; doi:10.1186/s12882-016-0430-4), 2017-01-06

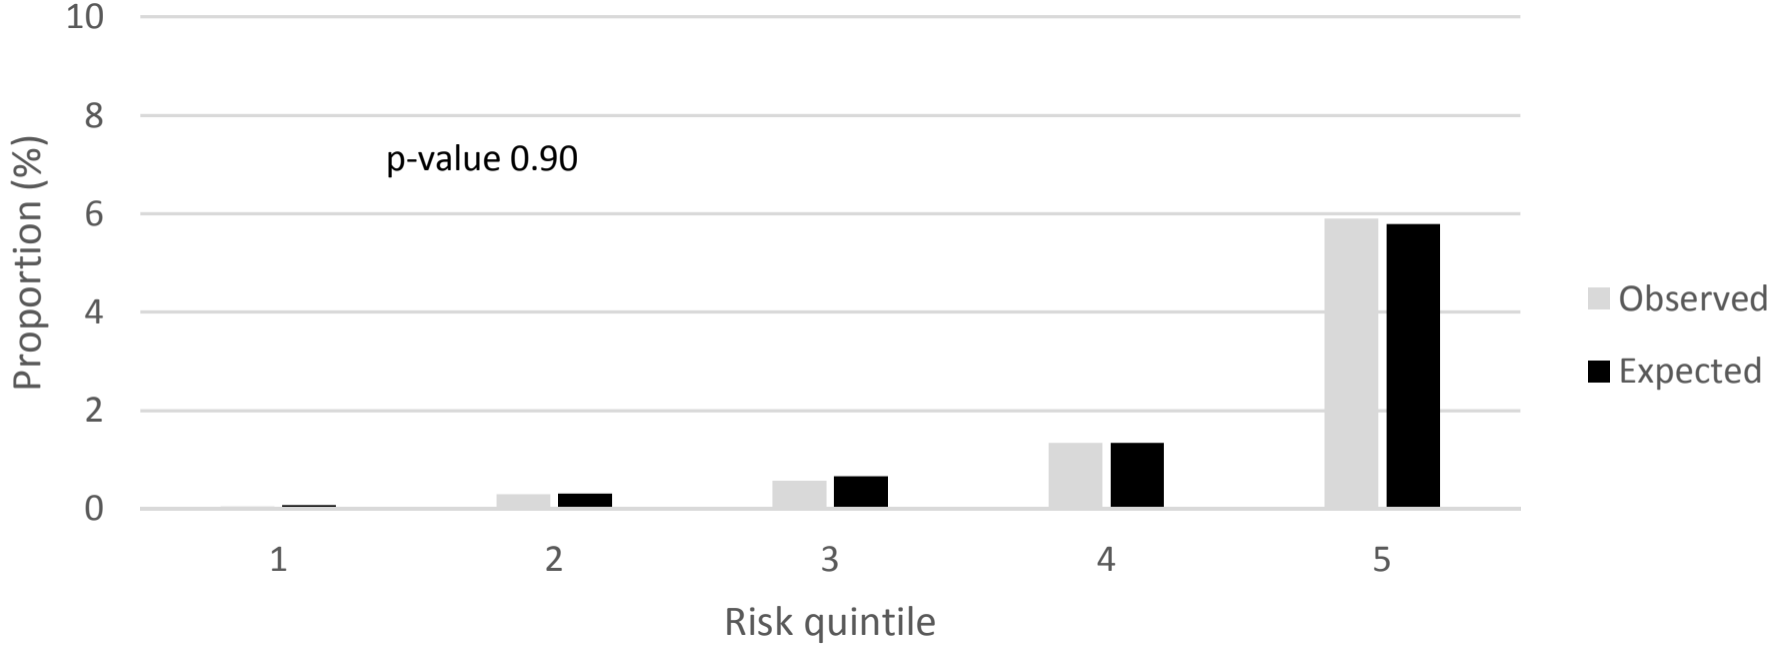

Supplement: 12882_2016_430_MOESM5_ESM.pdf [file 12882_2016_430_MOESM5_ESM.pdf]
