# Supplementary material for: Acute kidney injury as an independent risk factor for unplanned 90-day hospital readmissions
Source: PubMed Central journal article supplement (PMC5217258; doi:10.1186/s12882-016-0430-4), 2017-01-06
Supplement: 12882_2016_430_MOESM6_ESM.pdf [file 12882_2016_430_MOESM6_ESM.pdf]

## Aberdeen readmission risk calculator

Age

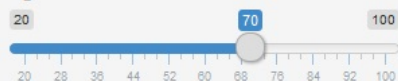

AKI severity stage (enter AKI stage 1-3 or no AKI)

AKI stage 3

Baseline eGFR

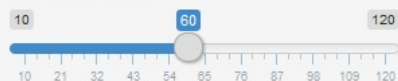

No. of previous admissions in past year

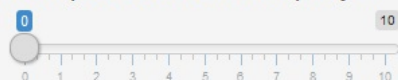

ADMISSION CONTEXT

Emergency  Elective

Residential care

No  Yes

Rural home location

No  Yes

PAST MEDICAL HISTORY

Cancer

No  Yes

Cardiac Failure

No  Yes

Diabetes

No  Yes

Pulmonary disease

No  Yes

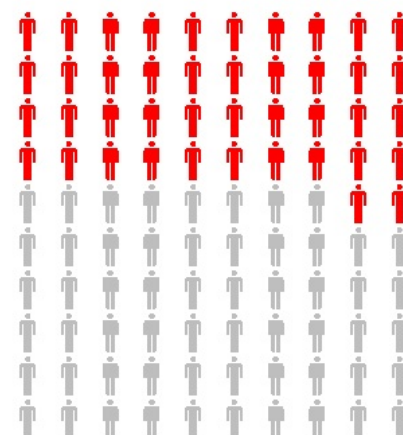

42/100 READMITTED 58/100 NOT\_READMITTED

Out of 100 people discharged, this is the proportion expected to be readmitted or die within 90 days.

42

## Aberdeen readmission risk calculator

Age

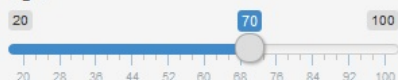

AKI severity stage (enter AKI stage 1-3 or no AKI)

No AKI

Baseline eGFR

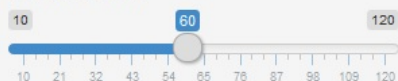

No. of previous admissions in past year

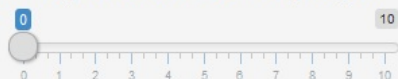

ADMISSION CONTEXT

Emergency  Elective

Residential care

No  Yes

Rural home location

No  Yes

PAST MEDICAL HISTORY

Cancer

No  Yes

Cardiac Failure

No  Yes

Diabetes

No  Yes

Pulmonary disease

No  Yes

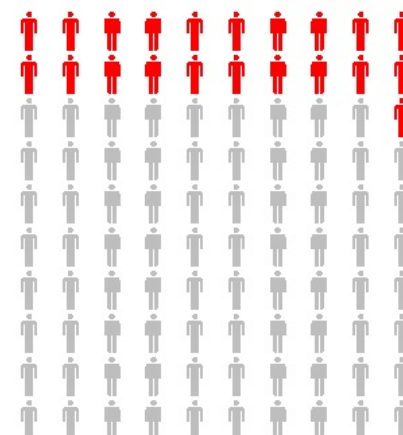

21/100 READMITTED 79/100 NOT\_READMITTED

Out of 100 people discharged, this is the proportion expected to be readmitted or die within 90 days.

21
