# Supplementary material for: Acute kidney injury as an independent risk factor for unplanned 90-day hospital readmissions
Source: Springer Nature journal article supplement (doi:10.1186/s12882-016-0430-4), 2017-01-06

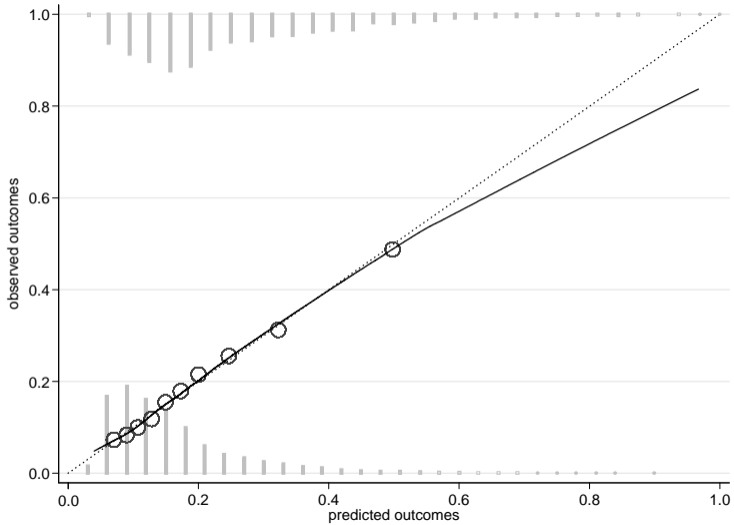

Supplement: MOESM2 [file 11981472]
